# Supplementary material
Source: MDPI journal article supplement (https://www.mdpi.com/2071-1050/9/8/1303)
Supplement: s1 [file s1]

## Supplementary Material Tables S1-S4

**Table S1. AHP analysis of sustainability main goals as evaluated with SCB Associates template [1]. Scale row versus column: 1 = equal importance, <1 = less important, >1 = more important.**

|              | Economy | Ecology | Society | Consistency Ratio | AHP   |
|--------------|---------|---------|---------|-------------------|-------|
| Economy      | 1       | 2       | 3       |                   | 54.5% |
| Ecology      | 1/2     | 1       | 2       |                   | 28.7% |
| Society      | 1/3     | 1/2     | 1       |                   | 16.8% |
|              |         |         |         |                   |       |
| Column Total | 1.83    | 3.50    | 6.00    | 1%                |       |

**Table S2. AHP analysis of economic criteria with pairwise comparison of individual criteria as evaluated with SCB Associates template [1]. Scale row versus column: 1 = equal importance, <1 = less important, >1 = more important**

|                    | Saving of energy | Investment costs | Life cycle costs | Amortisation costs | Consistency Ratio | AHP   |
|--------------------|------------------|------------------|------------------|--------------------|-------------------|-------|
| Saving of energy   | 1                | 3                | 4                | 3                  |                   | 52.1% |
| Investment costs   | 1/3              | 1                | 3                | 2                  |                   | 21.6% |
| Life cycle costs   | 1/4              | 1/3              | 1                | 1/2                |                   | 10.6% |
| Amortisation costs | 1/3              | 1/2              | 2                | 1                  |                   | 15.8% |
|                    |                  |                  |                  |                    |                   |       |
| Column Total       | 1.92             | 4.83             | 10.00            | 6.50               | 5%                |       |

**Table S3. AHP analysis of ecological criteria with pairwise comparison of individual criteria as evaluated with SCB Associates template [1]. Scale row versus column: 1 = equal importance, <1 = less important, >1 = more important**

|                 | Biodiversity | Saving of water | Soil quality | Air pollution | Water quality | Consistency Ratio | AHP   |
|-----------------|--------------|-----------------|--------------|---------------|---------------|-------------------|-------|
| Biodiversity    | 1            | 1/3             | 3            | 3             | 2             |                   | 21.3% |
| Saving of water | 3            | 1               | 4            | 3             | 2             |                   | 41.6% |
| Soil quality    | 1/3          | 1/4             | 1            | 1/2           | 1/3           |                   | 7.9%  |
| Air pollution   | 1/3          | 1/3             | 2            | 1             | 1/3           |                   | 10.4% |

|               |      |      |       |       |      |    |       |
|---------------|------|------|-------|-------|------|----|-------|
| Water quality | 1/2  | 1/2  | 3     | 3     | 1    |    | 18.8% |
|               |      |      |       |       |      |    |       |
| Column Total  | 5.17 | 2.42 | 13.00 | 10.50 | 5.67 | 6% |       |

Table S4. AHP analysis of social criteria with pairwise comparison of individual criteria as evaluated with SCB Associates template [1]. Scale row versus column: 1 = equal importance, <1 = less important, >1 = more important

|                  | Acceptance | Applicability | Work relief | Future potential | Consistency Ratio | AHP   |
|------------------|------------|---------------|-------------|------------------|-------------------|-------|
| Acceptance       | 1          | 2             | 4           | 3                |                   | 48.0% |
| Applicability    | ½          | 1             | 3           | 2                |                   | 26.2% |
| Work relief      | ¼          | 1/3           | 1           | ½                |                   | 10.3% |
| Future potential | 1/3        | 1/2           | 2           | 1                |                   | 15.5% |
|                  |            |               |             |                  |                   |       |
| Column total     | 2.08       | 3.83          | 10.00       | 6.50             | 2%                |       |
